# Supplementary material for: NLRP3 inflammasome assembly is regulated by phosphorylation of the pyrin domain
Source: PubMed Central journal article supplement — J Exp Med. 2017 Jun 5;214(6):1725–36. doi: 10.1084/jem.20160933 (PMC5460996; doi:10.1084/jem.20160933), 2017-06-05
Supplement: JEM_20160933_sm.pdf [file JEM_20160933_sm.pdf]

SUPPLEMENTAL MATERIAL

Stutz et al., <https://doi.org/10.1084/jem.20160933>

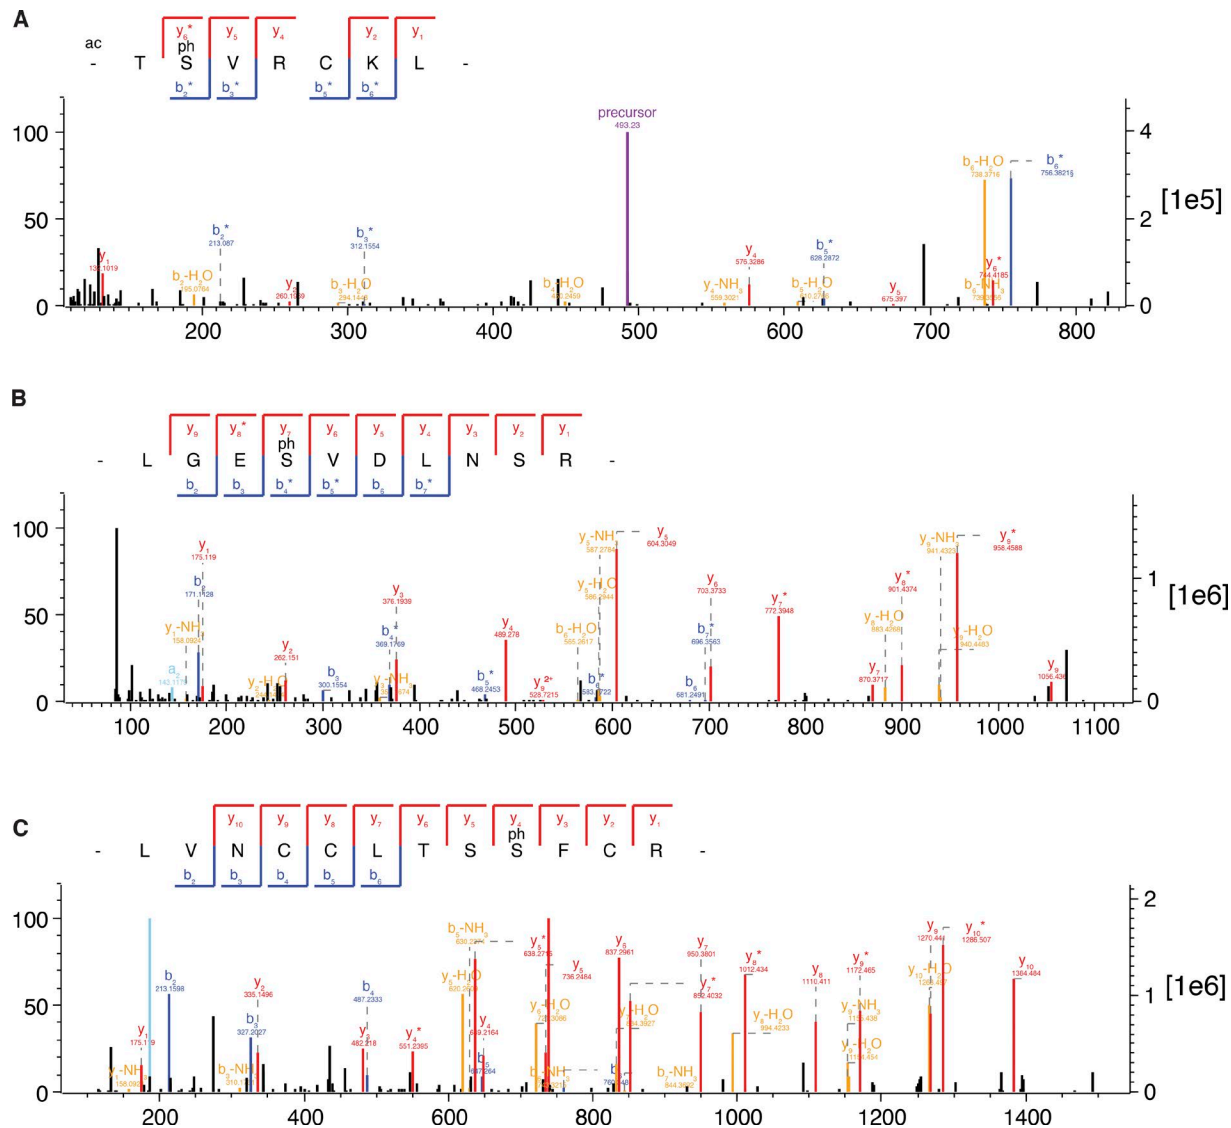

Figure S1. **Related to Figure 1.** MS spectra of phosphorylated peptides. (A-C) Annotated spectra for phosphorylated NLRP3 peptides with all annotated fragment ions, the Andromeda score and parent ion masses. Spectra are representative of at least two different experiments.
